## **Synaptic diversity naturally arises from neural decoding of heterogeneous populations**

Jacob L. Yates<sup>1</sup>, Benjamin Scholl<sup>2</sup>

<sup>1</sup>University of Maryland, College Park, Maryland, USA

<sup>2</sup>University of Pennsylvania, Department of Neuroscience, Perelman School of Medicine, Philadelphia, PA, USA

Running title: Synaptic diversity results from heterogeneity

Corresponding author: Benjamin Scholl, [benjamin.scholl@pennmedicine.upenn.edu](mailto:benjamin.scholl@pennmedicine.upenn.edu)

Number of pages: 25

Number of figures: 5

Number of tables: 0

Number of words Abstract: 198

Number of words Introduction: 675

Number of words Results: 3017

Number of words Discussion: 677

Conflict of Interest: The authors declare no competing financial interests.

Acknowledgements: This work was supported by the NIH and Max Planck Florida Institute. Jacob Yates is supported by the K99EY032179. Benjamin Scholl is supported by K99EY031137. We thank Alex Huk, Richard Lange, Sabya Shivkumar, Krishnan Padmanabhan, and Jan Kirchner for helpful comments and discussion.

Author contributions statement: J.Y and B.S. conceived of the experiment. J.Y. derived analytic solutions, J.Y and B.S. performed analysis, J.Y and B.S. wrote the manuscript.

## 1 **Abstract**

2  
3       The synaptic inputs to single cortical neurons exhibit substantial diversity in their sensory-  
4 driven activity. What this diversity reflects is unclear, and appears counter-productive in  
5 generating selective somatic responses to specific stimuli. We propose that synaptic diversity  
6 arises because neurons decode information from upstream populations. Focusing on a single  
7 sensory variable, orientation, we construct a probabilistic decoder that estimates the stimulus  
8 orientation from the responses of a realistic, hypothetical input population of neurons. We provide  
9 a straightforward mapping from the decoder weights to real excitatory synapses, and find that  
10 optimal decoding requires diverse input weights. Analytically derived weights exhibit diversity  
11 whenever upstream input populations consist of noisy, correlated, and heterogeneous neurons,  
12 as is typically found *in vivo*. In fact, *in silico* weight diversity was necessary to accurately decode  
13 orientation and matched the functional heterogeneity of dendritic spines imaged *in vivo*. Our  
14 results indicate that synaptic diversity is a necessary component of information transmission and  
15 reframes studies of connectivity through the lens of probabilistic population codes. These results  
16 suggest that the mapping from synaptic inputs to somatic selectivity may not be directly  
17 interpretable without considering input covariance and highlights the importance of population  
18 codes in pursuit of the cortical connectome.

## 19 20 **Introduction**

21  
22       Cortical neurons are driven by large populations of excitatory synaptic inputs. Synaptic  
23 populations ultimately shape how sensory signals are encoded, decoded, or transformed. The  
24 sensory representation or functional properties of an excitatory input population will define and  
25 constrain the operations a neuron can perform and reflects the rules neurons use to form  
26 connections. Electrophysiological and anatomical studies suggest that connections between  
27 excitatory neurons exhibits functional specificity, where inputs are tuned for similar features as  
28 the soma (Cossell et al., 2015; Ko et al., 2011; Lee et al., 2016; Reid and Alonso, 1995). In  
29 contrast, synaptic imaging techniques have revealed that synaptic populations exhibit functional  
30 diversity, deviating from canonical connectivity rules, such as 'like-connects-to-like' (Scholl and  
31 Fitzpatrick, 2020). This functional diversity within input populations has been observed in a variety  
32 of mammalian species, from rodents to primates, and for a variety of sensory cortical areas (Chen  
33 et al., 2013, 2011; Iacaruso et al., 2017; Jia et al., 2011, 2010; Ju et al., 2020; Kerlin et al., 2019;

34 Scholl et al., 2017; Wertz et al., 2015; Wilson et al., 2018, 2016). This apparent discrepancy  
35 challenges our understanding about how synaptic inputs drive the selective outputs of cortical  
36 neurons and leads to a simple fundamental question: If the goal is to produce selective somatic  
37 responses, why would a neuron have excitatory synaptic inputs tuned far away from the somatic  
38 preference?

39 To answer this question, we turn to population coding theory; starting with the idea that to  
40 accurately represent sensory signals, cortical neurons must decode the activity of upstream  
41 populations. This decoding is likely accomplished by combing signals across neural populations  
42 (Graf et al., 2011; Jazayeri and Movshon, 2006). Many studies have examined how sensory  
43 variables might be decoded from cortical populations (Butts and Goldman, 2006; Graf et al., 2011;  
44 Shamir and Sompolinsky, 2006), an endeavor increasingly applied to larger population sizes with  
45 innovative recording techniques (Rumyantsev et al., 2020; Stringer et al., 2019). These decoding  
46 approaches are often used as a tool to quantify the information about a stimulus available in a  
47 neural population, carrying the assumption that downstream areas could perform such a process  
48 (Berens et al., 2011; DiCarlo et al., 2012). In real brain circuits, decoders must be composed of  
49 individual neurons, driven by sets of synaptic inputs, akin to a decoder's weights over a given  
50 input population. To date, few studies have explicitly examined the weight structure of population  
51 decoders (Jazayeri and Movshon, 2006; Rust et al., 2006; Zavitz and Price, 2019).

52 In this paper, we investigate the weights of a simple population decoder and how they  
53 compare to real synaptic inputs measured *in vivo*. Focusing on a single sensory variable,  
54 orientation, we derive the maximum-likelihood readout for a simulated input population that  
55 encodes stimuli with noisy tuning curves (e.g., Ecker et al., 2011). Under reasonable assumptions,  
56 the decoder weights can be interpreted as the synaptic connectivity between the input population  
57 and the downstream decoder neurons. This allows us to examine how synaptic connectivity  
58 depends on properties of the input population and to directly compare population decoders to  
59 synaptic input measured *in vivo*. We then test a hypothesis that an optimal decoder will show  
60 substantial heterogeneity in its synaptic weights given a biologically realistic input population. We  
61 find that when input populations are shifted copies of the same tuning curve, the synaptic  
62 excitatory inputs closely resemble the somatic output. However, with a biologically realistic input  
63 population, the expected inputs onto readout neurons exhibit functional diversity. We then  
64 compare the orientation tuning of simulated inputs with large populations of dendritic spines  
65 (excitatory synaptic inputs) onto individual neurons of ferret primary visual cortex (V1), recorded  
66 with two-photon calcium imaging *in vivo*. This comparison revealed similar diversity in the  
67 orientation tuning of dendritic spines on ferret V1 neurons and simulated decoder weights. The

68 similarity between the synaptic populations of actual V1 neurons and the optimal neural decoder  
69 suggest that diversity and heterogeneity observed in dendritic spines across sensory cortices are,  
70 in fact, expected when considering how information is propagated through neural circuits in the  
71 presence of noise.

## 72 Results

73  
74  
75 Following several decades of work on population coding theory, we derive a Bayesian  
76 decoder to report the probability of a visual stimulus given inputs from a neural population (Fig.  
77 1). With this framework, and given the specifics of the *encoding* population, we can analytically  
78 derive the optimal *decoding* weights of a population of readout neurons. Here, we use “optimal”  
79 to refer to the maximum-likelihood solution. Previous work has shown that a population of neurons

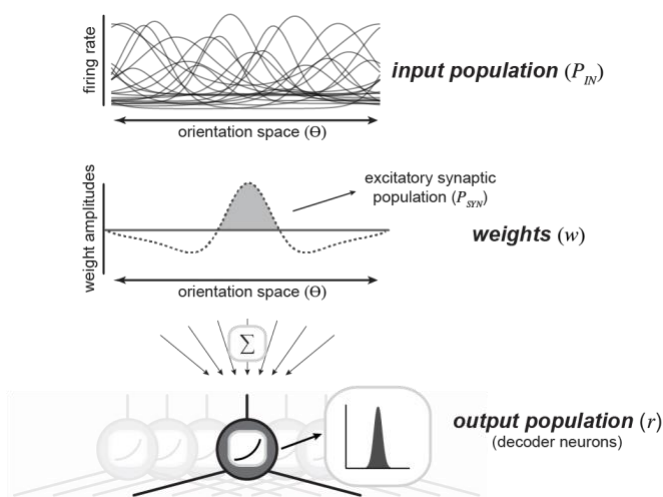

**Figure 1: A population decoding framework to study synaptic diversity.** An upstream population of neurons are tuned for a single stimulus variable (orientation) (*top*). This input population is readout by downstream decoder neurons (*bottom*). Downstream neurons decode stimulus identify by reading out spikes from the upstream input population. Each decoder neuron is defined by a set weights (*middle*) over the upstream population, which are summed and rectified to produce an output.

80 could perform such probabilistic decoding with weighted summation and divisive normalization,  
81 as long as their inputs exhibit Poisson-like noise (Jazayeri and Movshon, 2006; Ma et al., 2006).  
82 Starting from that basic framework, we derived a decoder that represents the probability that each  
83 possible stimulus orientation was present given the responses of a large population of upstream,  
84 input neurons ( $P_{IN}$ ). This is effectively a categorical decoder, where each possible orientation is a  
85 different category. Similar decoders have been used throughout the literature to estimate how  
86 much information is in a neural recording and suggest how downstream neurons might read it out  
87 (Graf et al., 2011; Stringer et al., 2019). Our decoder has weight vectors for each possible stimulus

88 orientation, which integrate across  $P_{IN}$  and are passed through a static nonlinearity (the  
89 exponential function) and normalized. As we will show below, given specific assumptions about  
90 the variability in  $P_{IN}$ , the weights over  $P_{IN}$  depend systematically on the tuning functions and  
91 covariance of  $P_{IN}$ . Following a characterization of this decoding framework, we will make direct  
92 comparisons with real data: defining an effective "synaptic input population" ( $P_{SYN}$ ) as nonzero,  
93 positive weights over  $P_{IN}$ . Although our strategy applies to any one-dimensional stimulus variable,  
94 we describe this model in the context of orientation of drifting gratings presented to V1 neurons  
95 for a direct comparison with *in vivo* measurements.

96

97 *A neural population as a probabilistic decoder*

98

99 A categorical probabilistic decoder reports the probability that a particular stimulus  
100 orientation,  $\theta_k$ , was present given the spiking responses of an input population,  $\mathbf{R}$ . This can be  
101 expressed as a normalized exponential function of the log-likelihood plus the log prior for each  $\theta_k$ ,

$$102 \quad p(\theta_k | \mathbf{R}) = \frac{p(\mathbf{R} | \theta_k) p(\theta_k)}{\sum_i p(\mathbf{R} | \theta_i) p(\theta_i)} = \frac{e^{L(\theta_k)}}{\sum_i e^{L(\theta_i)}}$$

103 where

$$104 \quad L(\theta_k) = \ln(p(\mathbf{R} | \theta_k)) + \ln(p(\theta_k))$$

105 The likelihood,  $p(\mathbf{R} | \theta_k)$ , is the probability of the observed responses in an input population given  
106 the stimulus  $k$  and  $p(\theta_k)$  is the prior probability of that stimulus class. If  $p(\mathbf{R} | \theta_k)$  is in the exponential  
107 family, then  $L(\theta_k)$  can be written as a weighted sum of the input population response vector plus  
108 an offset, which can be estimated numerically via multinomial logistic regression (Ma et al., 2006).  
109 For simplicity, we assume the input population has a response that is a function of the stimulus  
110 plus Gaussian noise, and equal covariance across all stimulus conditions. Although this  
111 assumption about the covariance structure deviates from real neural activity, this assumption  
112 means the weights and offset can be solved analytically (see Methods), and as will be shown  
113 below, such a simple model makes substantial headway in explaining biological phenomena. Our  
114 goal here is to provide a plausible alternative to "somatic selectivity" for the connectivity rules in  
115 cortex. Under the Gaussian assumption, the decoder amounts to:

$$116 \quad p(\theta_k | \mathbf{R}) = \frac{e^{(\mathbf{R}^T \mathbf{w}_k + \beta_k)}}{\sum_{i=1}^K e^{(\mathbf{R}^T \mathbf{w}_i + \beta_i)}} \quad (1)$$

117 where

$$118 \quad \mathbf{w}_k = \mathbf{Q}^{-1} f(\theta_k)$$

119 
$$\beta_k = -\left(\frac{1}{2}\right) f(\theta_k)^T Q^{-1} f(\theta_k) + \ln p(\theta_k)$$

120 Here,  $f(\theta_k)$  is the mean input population response to stimulus orientation,  $k$ ,  $K$  is the total number  
121 of orientations, and  $Q$  is the covariance matrix. The covariance term captures the influence of  
122 each neuron's response variance (diagonal elements) and the variability shared with other  
123 neurons (off-diagonal elements). Intuitively, in the absence of covariability (i.e., off-diagonal  
124 elements are zero), the weights are proportional to the signal-to-noise ratio of the neuron (the  
125 mean divided by the variance). The term  $\mathbf{R}^T w_k$  is the dot product between the population response  
126 and weights. The second term,  $\beta_k$ , is an offset for each stimulus.  $\ln p(\theta_k)$  is a constant reflecting  
127 the log prior probability of stimulus  $k$ . It is worth noting that if the covariance depends on the  
128 stimulus, the optimal readout is no longer a linear function of  $\mathbf{R}$  and is quadratic, which can be  
129 interpreted as a complex-cell (Jaini and Burge, 2017; Pagan et al., 2016) and is a potentially  
130 fruitful future direction.

131 In this study, we focus on the weights of this simple Gaussian, equal covariance decoder  
132 in order to examine how synaptic tuning from such a simple decoder would arise. Because the  
133 optimal weights have an analytic solution (eq. 1), we can see how they depend on the parameters  
134 of  $P_{IN}$ . The simplifying assumptions we use to derive the maximum-likelihood weights help build  
135 intuitions about what can be expected in biological circuits, and linear weights such as these could  
136 be learned by real neural systems (Dayan and Abbott, 2001). A key difference here from prior  
137 work is that rather than focus on discrimination (Haefner et al., 2013), we treat orientation  
138 estimation as a multiclass identification problem, discretizing  $\theta$  such that for each possible  $\theta_k$ ,  
139 there is a separate weight vector. Thus, in this derivation, the optimal weights depend on the  
140 tuning curves themselves, not the derivative.

141

### 142 *Characteristics of a neural population decoder*

143

144 To understand how synaptic weights depend on input statistics, we derived maximum-  
145 likelihood weights for input populations,  $P_{IN}$ , with different tuning and covariance. To generate  $P_{IN}$   
146 we simulated  $N$  neurons responding to  $K$  oriented stimuli ( $\theta = [-90^\circ:K/180:+90^\circ]$ ). We briefly  
147 describe the construction of  $P_{IN}$  here (full details are described in the Methods). Each neuron is  
148 defined by a tuning function and noise term, describing trial-by-trial variability, which are summed  
149 to generate stimulus-driven responses. We compared two fundamentally different types of input  
150 populations that have been used in the literature, homogeneous and heterogenous, as well as  
151 the role of correlated variability in shaping readout weights. A homogeneous  $P_{IN}$  consists of shifted

152 copies of a single tuning curve (Fig. 2a). Heterogenous  $P_{IN}$  have diverse tuning functions and  
 153 were generated to match measurements from macaque V1 (Ringach et al., 2002). The  
 154 heterogenous  $P_{IN}$  consisted of tuning curves closely resembling V1 physiology in terms of the  
 155 variation in peak firing rate, bandwidth, and baseline firing rate (Fig. 2d). Varying amounts of  
 156 limited-range correlations were included such that the noise correlation between two neurons

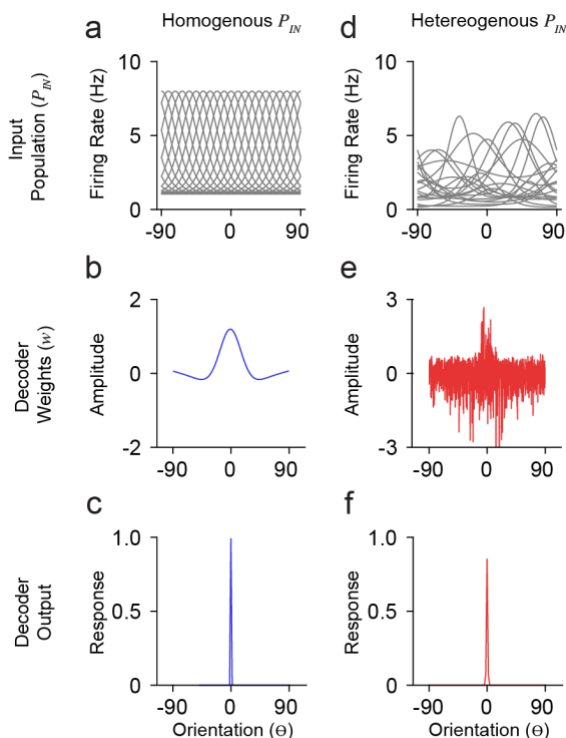

**Figure 2: Model simulations with homogenous and heterogeneous input populations.**

(a) Orientation tuning of a homogenous input population. Shown is a subset of the total population ( $n = 20/1000$ ). Ordinate is orientation preference, restricted between  $-90^\circ$  and  $90^\circ$ . (b) Derived weights for a single decoder neuron (preferring  $0^\circ$ ) reading out the homogenous (blue) input population in (a). Weights for homogenous populations smoothly vary over orientation space. (c) Response output of the decoder neuron whose weights are shown in (b). (d-f) Same as in (a-c) for a heterogeneous input population with moderate correlation ( $c_o = 0.25$ ). Note that decoder weights for heterogeneous input populations are not smooth.

157 depends on the difference in their tuning preferences (Ecker et al., 2011; Kohn et al., 2016).

158 The statistics of  $P_{IN}$  responses,  $\mathbf{R}$ , will dictate the weight structure for neurons in a decoding  
 159 population. For a homogeneous  $P_{IN}$ , the weights are smooth across orientation space and exhibit  
 160 three primary features: a prominent peak about the preferred orientation of the output tuning,  
 161 slight negative weights for orientations just outside the preferred, and near-zero weights at  
 162 orthogonal orientations (Fig. 2c). With more realistic tuning diversity (heterogenous  $P_{IN}$ ), optimal  
 163 weights are no longer smooth (Fig. 2d-e). While the optimal weights appear to roughly have the  
 164 same overall shape as for homogeneous  $P_{IN}$ , there is considerable positive and negative



165 weighting across orientation space. Despite substantial changes in optimal weight vectors, the  
 166 decoder output (i.e. somatic response) tuning was narrow (Fig. 2f), similar to the output for the  
 167 homogeneous case (Fig. 2e).

168 To explore the importance of decoding weight diversity, we imposed a smoothing penalty  
 169 on weight vectors (Park and Pillow, 2011). We calculated cross-validated decoder accuracy using  
 170 the mean-squared error between the maximum a posteriori estimation and true stimulus (see  
 171 Methods). Different degrees of smoothing are shown for an example set of weights in Figure 3a.  
 172 We simulated a range of population sizes ( $N = 2 - 2048$ ) and correlations ( $c_o = 0, 0.25, 0.50$ ).

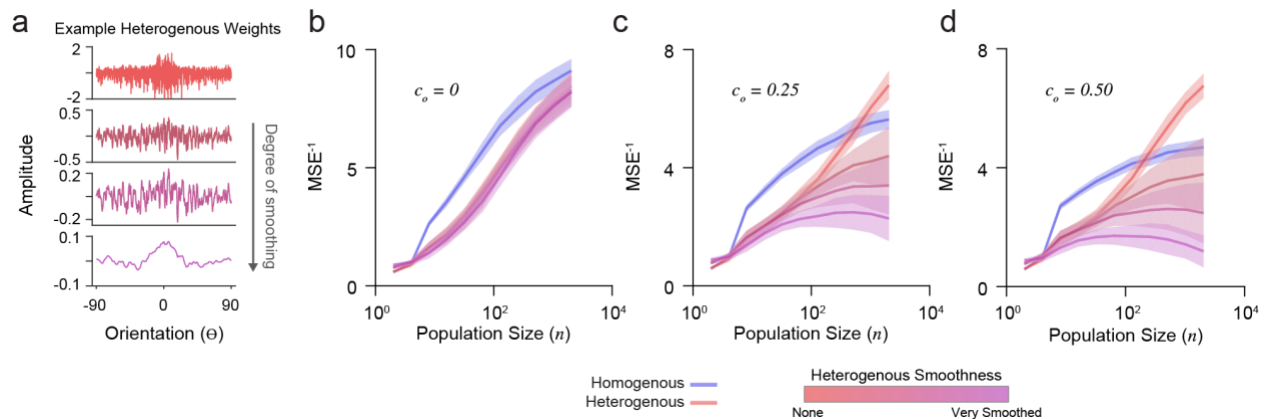

**Figure 3: Decoder performance of heterogeneous input populations depends on population size, correlations, and weight diversity.** (a) Example weight distribution for a decoder neuron reading out a heterogeneous input population (top). Shown are the effects of progressively smoothing weights. Smooth parameters (see Methods) from top to bottom: (0,0), (0.1,1), (0.2, 2), (1,10). Ordinate is orientation preference, restricted between  $-90^\circ$  and  $90^\circ$ . (b) Decoder performance (inverse mean-squared-error) plotted for homogenous and heterogeneous input populations of increasing size. Simulations here include no correlations ( $c_o = 0$ ). Shading indicates standard error. (c) Same as in (b) for input populations with moderate correlation ( $c_o = 0.25$ ). (d) Same as in (b) for input populations with stronger correlation ( $c_o = 0.50$ ).

173 Without noise-correlations, the accuracy of all decoders increases with population size,  
 174 with a homogenous  $P_{IN}$  performing best (Fig. 3b). In the presence of noise-correlations, accuracy  
 175 saturates for large homogenous  $P_{IN}$  (Fig. 3c-d). As previously shown (Ecker et al., 2011), accuracy  
 176 for heterogeneous populations with limited-range correlations does not saturate (Fig. 3c-d).  
 177 However, this depends on weight diversity. Smoothing the weights for heterogeneous  $P_{IN}$  caused  
 178 saturation and decreased accuracy (Fig. 3c-d), demonstrating that weight amplitude diversity in  
 179 analytically derived weights distributions are critical for the decoder performance.

180

181 *Simulating excitatory weight tuning*

182



183 In order to compare analytically derived weights with the synaptic inputs onto V1 neurons  
184 measured *in vivo*, we generated excitatory synaptic input populations ( $P_{SYN}$ ). Under the  
185 assumption that synaptic integration is linear, two synapses of equal weight are the same as one  
186 synapse with double that weight. This creates a degeneracy where synapse count and size trade  
187 off. Because current spine imaging techniques typically capture large synapses and there is no  
188 relationship between strength and orientation preference (Scholl et al., 2021), we can assume  
189 size is fixed and convert the derived weights into a frequency distribution of ‘synaptic inputs’ (Fig.  
190 4a). The tuning curve for such a synapse is the tuning curve of the input and thus, the synaptic  
191 input population,  $P_{SYN}$ , is the input population resampled with probabilities given by the derived  
192 weights. An example  $P_{SYN}$  for a single decoder neuron is shown in Figure 4b (drawn from the  
193 heterogeneous  $P_{IN}$  in Figure 2).  $P_{SYN}$  in this example displays some specificity in orientation tuning  
194 relative to the somatic output, indicated by a larger proportion of simulated synapses with similar  
195 orientation preference as the somatic output ( $0^\circ$ ) of the decoder neuron.

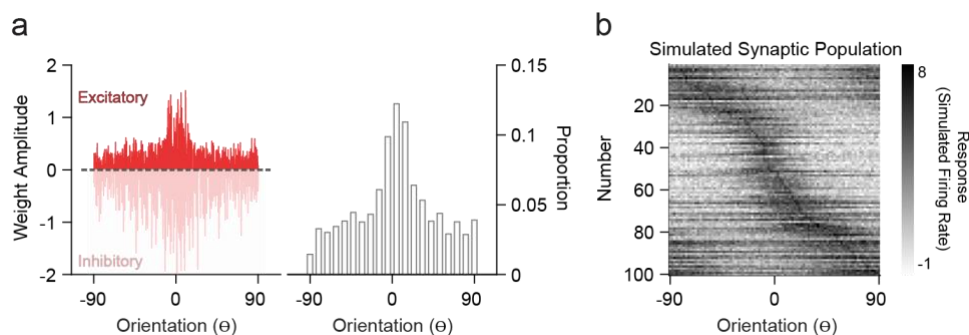

**Figure 4: Simulation of synaptic populations from decoder neuron weight distributions.** (a) Example weight distribution for a single decoder neuron tuned to  $0^\circ$  (left). Ordinates are orientation preference, restricted between  $-90^\circ$  and  $90^\circ$ . Dashed line separates excitatory (positive) and inhibitory (negative) weights. Excitatory weight distribution over the input population is transformed into a frequency distribution, whereby greater amplitude equates to greater frequency of occurrence (right). (b) Example simulated synaptic population ( $n = 100$  spines) from the weight distribution in (a). Shown are the orientation tuning curves of each simulated synapse (normalized).

196  
197 *Empirical distribution of dendritic spine tuning is consistent with decoding of a heterogeneous*  
198 *input population*

199 We analyzed two-photon calcium recordings from soma and corresponding dendritic  
200 spines on individual neurons in ferret V1 during the presentation of oriented drifting gratings (see  
201 Methods). While our model draws from a  $P_{IN}$  matched to measurements from macaque V1, the  
202 orientation tuning of layer 2/3 neurons in ferret V1, as measured by two-photon cellular imaging,  
203 exhibit a similar range in selectivity (Wilson et al., 2017). Visually responsive and isolated dendritic  
204 spines (see Methods) typically exhibit diverse orientation tuning relative to the somatic output,

205 although some individual cells show greater overall diversity (Fig. 5b) than others (Fig. 5a). To  
 206 characterize  $P_{SYN}$  diversity, both for real dendritic spines and simulated inputs, we computed the  
 207 Pearson correlation coefficient between the tuning curves of individual inputs and the  
 208 corresponding somatic output (Scholl et al., 2021). For these comparisons, we sampled  
 209 orientation space in the model spines to match our empirical measurements (22.5 deg  
 210 increments) and the number of total excitatory inputs recovered for each simulated downstream  
 211 neuron was set to 100, similar to the average number of visually-responsive spines recorded for

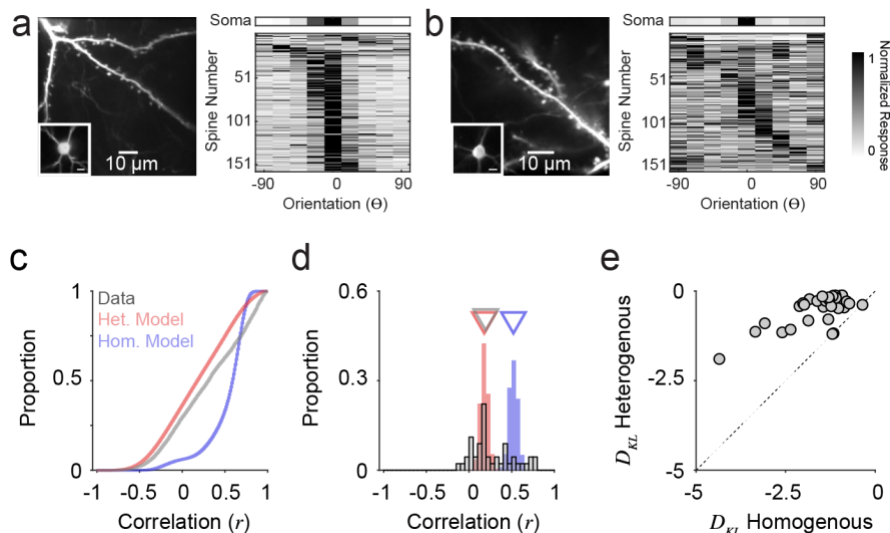

**Figure 5: Orientation tuning diversity of dendritic spine populations in ferret V1 match simulations with correlated, heterogeneous input populations.** (a) Two-photon standard-deviation projection of example dendrite and spines recorded from a single cell (*left*). Inset: Two-photon standard-deviation projection of corresponding soma. Scale bar is 10 microns. Orientation tuning of soma (*top*) and all visually-responsive dendritic spines from this single cell ( $n = 159$ ) are shown (*right*). Spine responses are normalized peak  $\Delta F/F$ . Orientation preferences are shown relative to the somatic preference (aligned to  $0^\circ$ ). (b) Same as in (a) for another example cell ( $n = 162$  visually-responsive spines). (c) Cumulative distributions of tuning correlation between individual dendritic spines or simulated synaptic inputs with corresponding somatic tuning or decoder output. Shown are correlations of simulations of homogenous (*blue*) or heterogeneous (*red*) input populations, compared to empirical data (*gray*). (d) Distributions of average tuning correlation between synaptic input and somatic output across measured cells ( $n = 45$ ). Also shown are distributions of average tuning correlation for simulated cells. Triangles denote median values for each distribution. (e) Comparison of Kullback-Leibler divergence ( $D_{KL}$ ) between data and each model type. Each data point represents an individual cell's population of dendritic spines.

212 each ferret V1 neuron ( $n = 45$ ,  $n = 158.9 \pm 73.2$  spines/cell). Simulations were run 10,000 times,  
 213 with  $N = 1,000$  for  $P_{IN}$  and  $c_o = 0.20$ .

214 Across all simulated inputs, input-output tuning correlation was higher for homogeneous  
 215  $P_{SYN}$  compared to heterogeneous  $P_{SYN}$  (median  $r_{hom} = 0.60$ , median  $r_{het} = 0.18$ ,  $n = 900,000$ ; Fig.  
 216 5c). Tuning correlation between all imaged dendritic spines and soma was low (median  $r_{cell} =$

217 0.31,  $n = 7,151$  spines from 45 cells), more closely resembling our model with a heterogeneous  
218  $P_{IN}$ . As somatic orientation selectivity (i.e., tuning bandwidth) varies for single cells in ferret V1  
219 (Goris et al., 2015; Wilson et al., 2016), we next examined the average input-output tuning  
220 correlation across individual cells (Fig. 5d). Here, the homogeneous model exhibited greater  
221 specificity than the heterogeneous model (median  $r_{hom} = 0.52$ ; median  $r_{het} = 0.18$ ,  $n = 90,000$ ). For  
222 ferret V1 cells, we observed similar spine-soma correlation as the heterogeneous simulation  
223 (median  $r_{cell} = 0.20$ ,  $n = 45$ ). Ferret V1 cells were not statistically different from neural decoders  
224 with a heterogeneous  $P_{SYN}$  ( $p = 0.19$ , Mann-Whitney test), while neural decoders with a  
225 homogeneous  $P_{SYN}$  were significantly more correlated with the inputs ( $p < 0.0001$ , Mann-Whitney  
226 test). A small percentage of imaged cells (17.9%,  $n = 5/28$ ) had synaptic populations whose mean  
227 tuning correlation were within the 95% confidence interval of the homogeneous model distribution.  
228 Additionally, some cells had negative average correlations with their spines, which never occurred  
229 in the models—potentially indicating nonlinearities between the spines and soma. It is also  
230 important to emphasize that both synaptic populations and the heterogeneous model exhibit a  
231 positive bias in tuning correlations, illustrating that while inputs are functionally diverse, they are,  
232 on average, more similarly tuned to the cell/decoder output.

233         Given the differences between ferret V1 neurons, we quantified the degree to which  
234 synaptic populations on *each* neuron matched tuning correlation distributions from models of  
235 homogeneous and heterogeneous  $P_{IN}$ , by calculating the Kullback-Leibler divergence ( $D_{KL}$ , bin size  
236 = 0.05, see Methods). Across our population, imaged neurons more closely resembled  
237 simulations with heterogeneous, compared to homogeneous,  $P_{IN}$  (93.3%,  $n = 42/45$ ; Fig. 5e) and  $D_{KL}$   
238 from a heterogeneous model was consistently larger ( $p < 0.0001$ , sign rank Wilcoxon test). This  
239 trend held for a range of histogram bin sizes (0.001 – 0.20). Importantly, the models are not fit to  
240 data. They are derived entirely from the statistics of the input population, so this correspondence  
241 between the heterogeneous model and the data results from no free parameters.

242         In addition to the similarity in input-output tuning correlation, we observed several trends  
243 predicted by the heterogeneous model that were evident in synaptic populations imaged *in vivo*.  
244 Simulated excitatory inputs correlated with the decoder output were not more selective for  
245 orientation (see Methods) (bootstrapped PCA slope =  $0.001 \pm 0.004$  s.e.,  $n = 10,000$  simulation  
246 runs). For two-photon data, a minuscule, but significant, trend was evident (bootstrapped PCA  
247 slope =  $0.03 \pm 0.1$  s.e.,  $n = 7151$ ). So while selective inputs are proposed to provide more  
248 information about encoded stimulus variables (Seriès et al., 2004; Shamir and Sompolinsky,  
249 2006; Zavitz and Price, 2019) and unselective (or poorly selective) inputs could convey  
250 information through their covariance with selective neurons (Zylberberg, 2017), our model and

251 experimental data suggest co-tuned and orthogonally-tuned inputs exhibit a wide range of tuning  
252 selectivity. Response variability (i.e. standard deviation) across trials for simulated excitatory  
253 inputs was significantly smaller for ‘null’ orientations ( $\pm 90$  deg) than at the ‘preferred’ (median =  
254 0.30 and IQR = 0.14, median = 0.38 and IQR = 0.22, respectively;  $p < 0.001$ , Wilcoxon ranksum  
255 test). This trend was also observed in our two-photon data (null: median = 0.13 and IQR = 0.15;  
256 preferred: median = 0.23 and IQR = 0.31, respectively;  $p < 0.001$ , Wilcoxon ranksum test). As  
257 both modeled and imaged neurons had “null”-tuned excitatory inputs that exhibited less response  
258 variability, these inputs may carry useful information about when the preferred stimulus is *not*  
259 present.

260 Taken together, our decoding framework with a realistic (i.e. heterogenous orientation  
261 tuning), noisy input populations suggest the collection of orthogonally-tuned excitatory inputs in  
262 cortical neurons *in vivo* are not unexpected. Instead, the synaptic architecture of layer 2/3 neurons  
263 in ferret visual cortex are likely optimized for the readout of upstream populations tuned to  
264 orientation.

265

## 266 Discussion

267

268 We used a population decoding framework (Jazayeri and Movshon, 2006; Kohn et al.,  
269 2016; Pouget et al., 2000; Shamir, 2014) to elucidate a possible source of synaptic diversity in  
270 functional response properties. We find that even simple decoders exhibit substantial  
271 heterogeneity in their weights when the inputs are noisy, correlated neural populations with  
272 heterogeneous orientation tuning. We argue that this could naturally explain the heterogeneity in  
273 synaptic inputs measured *in vivo* if these cortical neurons are decoding information from upstream  
274 input populations. We compared two neural decoders: one with homogenous input (Jazayeri and  
275 Movshon, 2006) and one with heterogenous input (Ecker et al., 2011). We show that empirical  
276 measurements from dendritic spines recorded within individual cortical neurons in ferret V1 exhibit  
277 a similar amount of diversity in orientation tuning as simulated inputs (i.e. excitatory weights) from  
278 heterogeneous input populations. It may appear trivial that heterogeneous input populations  
279 would produce heterogeneous weights, but it was neither immediately obvious that the weights  
280 would not be smooth nor that excitatory weights would be evident for orthogonal orientations.  
281 Orthogonally-tuned or non-preferred inputs are often considered to be aberrant; to be pruned  
282 away during experience-dependent plasticity or development (Holtmaat and Svoboda, 2009). Our  
283 decoding approach suggests these inputs are purposeful and emerge through development as  
284 cortical circuits learn the statistics of their inputs (Avitan and Goodhill, 2018). Taken together, our

285 results shed light on synaptic diversity that has been puzzling, suggesting that it is, in fact,  
286 expected given known properties of the input population.

287 We believe our study is a significant step forward in combining population coding theory  
288 (Averbeck et al., 2006; Pouget et al., 2000) and functional connectomics (Wilson et al., 2016).  
289 The ability to measure receptive field properties and statistics of sensory-driven responses of  
290 synapses *in vivo* provides a new testing bed for population codes. The individual neurons which  
291 synapses converge on are the real components of what has long been a hypothetical downstream  
292 population decoder. While we did not set out to build a computational or biophysical model of a  
293 neuron, we believe simplistic approaches such as ours are fruitful for understanding basic  
294 principles.

295 To limit complexity, our decoder did not account for many aspects of cortical networks  
296 such as stimulus-dependent correlations or recurrent connections. In the case of stimulus  
297 dependent covariance, the optimal decoder is no longer linear, however, that decoder closely  
298 resembles a complex cell (Jaini and Burge, 2017; Pagan et al., 2016). Extending a decoding  
299 framework to include realistic noise has been used to capture many nonlinear features of neural  
300 responses including divisive normalization, gain control, and contrast-dependent temporal  
301 dynamics— all features which fall naturally out from a normative framework (Chalk et al., 2017).  
302 These more sophisticated approaches may be able to make predictions about the synaptic  
303 organization itself, whereby local clusters of synapses act as nonlinear subunits (Ujfalussy et al.,  
304 2018).

305 Our model does not describe a cortical transformation. Instead, to limit complexity, we  
306 focused on the propagation of orientation selectivity from one neural population to another, akin  
307 to the propagation of basic receptive field properties from V1 to higher-visual areas. Our approach  
308 was chosen to provide a starting point for predicting the tuning diversity of synaptic input  
309 populations as compared to the tuning output or downstream cells. However, this model could be  
310 modified to study the convergence and transformation of cortical inputs. An obvious case study  
311 would be complex cells in layer 2/3 V1 (Hubel and Wiesel, 1962; Movshon et al., 1978; Spitzer  
312 and Hochstein, 1988), which are thought to integrate across presynaptic cells with similar oriented  
313 receptive field with offset spatial subunits to produce polarity invariance. This extension would be  
314 better suited for a nonlinear quadratic decoder (Jaini and Burge, 2017; Pagan et al., 2016), rather  
315 than the linear one used here. We hope that future studies build upon this modeling framework,  
316 exploring quadratic decoders and work towards using richer visual stimuli and neural models  
317 (Chalk et al., 2017). We believe this will be critical for gaining insight into how information

318 propagates between cortical areas and from largescale measurements of cortical functional  
319 connectivity.

## 320 **Materials and Methods**

321

322 All procedures were performed according to NIH guidelines and approved by the  
323 Institutional Animal Care and Use Committee at Max Planck Florida Institute for Neuroscience.

324

### 325 *Derivation for a Bayesian probabilistic decoder*

326

327 We construct a probabilistic decoder, represented by a population of neurons, that reports  
328 or estimates the identity of a stimulus from the spiking response of an input population of neurons.  
329 We assume an input population with responses that are a function of the stimulus,  $f(\theta_k)$ , plus  
330 Gaussian noise,  $f(\theta_k)$ , and the covariance ( $Q$ ) is equal for all stimulus conditions ( $Q$ ) such that  $Q$   
331  $= Q_k = Q_i$ . Then, the posterior distribution can be written as

$$332 \quad p(\theta_k|R) = \frac{p(\theta_k) N(f(\theta_k), Q)}{\sum_i^K p(\theta_i) N(f(\theta_i), Q)}$$

333 where a multivariate Gaussian is

$$334 \quad N(f(\theta_k), Q) = 2\pi^{-\frac{n}{2}} |Q|^{-\frac{1}{2}} e^{\left(-\frac{1}{2}(\mathbf{R}-f(\theta_k))^T Q^{-1}(\mathbf{R}-f(\theta_k))\right)}$$

335 This can be expanded and simplified such that

$$336 \quad p(\theta_k|R) = \frac{p(\theta_k) 2\pi^{-\frac{n}{2}} |Q|^{-\frac{1}{2}} e^{\left(-\frac{1}{2}(\mathbf{R}-f(\theta_k))^T Q^{-1}(\mathbf{R}-f(\theta_k))\right)}}{\sum_i^K p(\theta_i) 2\pi^{-\frac{n}{2}} |Q|^{-\frac{1}{2}} e^{\left(-\frac{1}{2}(\mathbf{R}-f(\theta_i))^T Q^{-1}(\mathbf{R}-f(\theta_i))\right)}}$$

$$337 \quad p(\theta_k|R) = \frac{p(\theta_k) e^{\left(-\frac{1}{2}(\mathbf{R}^T Q^{-1} \mathbf{R} - f(\theta_k)^T Q^{-1} \mathbf{R} - \mathbf{R}^T Q^{-1} f(\theta_k) + f(\theta_k)^T Q^{-1} f(\theta_k))\right)}}{\sum_i^K p(\theta_i) e^{\left(-\frac{1}{2}(\mathbf{R}^T Q^{-1} \mathbf{R} - f(\theta_i)^T Q^{-1} \mathbf{R} - \mathbf{R}^T Q^{-1} f(\theta_i) + f(\theta_i)^T Q^{-1} f(\theta_i))\right)}}$$

$$338 \quad p(\theta_k|R) = \frac{p(\theta_k) e^{-\frac{1}{2} \mathbf{R}^T Q^{-1} \mathbf{R}} e^{\left(f(\theta_k)^T Q^{-1} \mathbf{R} - \frac{1}{2} f(\theta_k)^T Q^{-1} f(\theta_k)\right)}}{\sum_i^K p(\theta_i) e^{-\frac{1}{2} \mathbf{R}^T Q^{-1} \mathbf{R}} e^{\left(f(\theta_i)^T Q^{-1} \mathbf{R} - \frac{1}{2} f(\theta_i)^T Q^{-1} f(\theta_i)\right)}}$$

$$339 \quad p(\theta_k|R) = \frac{e^{\left(\mathbf{R}^T Q^{-1} f(\theta_k) - \frac{1}{2} f(\theta_k)^T Q^{-1} f(\theta_k) + \ln p(\theta_k)\right)}}{\sum_i^K e^{\left(\mathbf{R}^T Q^{-1} f(\theta_i) - \frac{1}{2} f(\theta_i)^T Q^{-1} f(\theta_i) + \ln p(\theta_i)\right)}}$$

$$340 \quad p(\theta_k|R) = \frac{e^{(\mathbf{R}^T w_k + \beta_k)}}{\sum_i^K e^{(\mathbf{R}^T w_i + \beta_i)}}$$

341 where

$$342 \quad w_k = Q^{-1} f(\theta_k)$$



$$\beta_k = -\left(\frac{1}{2}\right) f(\theta_k)^T Q^{-1} f(\theta_k) + \ln p(\theta_k)$$

Here,  $w$  are the weights over  $k$  for each neuron in the decoder population and  $\beta$  is a constant term for each  $k$ . Importantly, because we assume Gaussian input, with this formulation,  $w$  and  $\beta$  are derived closed form. More generally,  $w$  and  $\beta$  can be estimated numerically using multinomial logistic regression and this form remains optimal for any input population statistics within the exponential family (e.g., Poisson noise).

### Input population model

To generate input populations ( $P_{IN}$ ), we simulated  $N$  neurons responding to a stimulus characterized by orientation ( $\theta_k \in [-\pi/2:\pi/2K:\pi/2]$ ). The response of each neuron,  $r_i$ , depends on a tuning function,  $f_i(\theta)$ , and an additive noise term,  $\varepsilon_i$ , describing trial-to-trial variability. Noise is correlated across the population, generated from a multivariate Gaussian distribution with zero mean and covariance  $C$ . Orientation tuning functions were defined as:

$$f_i(\theta) = \alpha_i + \beta_i e^{\kappa_i [\cos(\theta - \phi_i)^2 - 1]}$$

Here,  $\alpha$  is the baseline firing rate,  $\beta$  scales the tuned response,  $\kappa$  scales the tuning bandwidth, and  $\phi$  is the orientation preference of each neuron. For homogeneous  $P_{IN}$  all parameters except  $\phi$  were fixed:  $(\alpha, \beta, \kappa) = (0, 5, 4)$ . For heterogeneous  $P_{IN}$ , we sampled parameters to match measurements from macaque V1 (Ringach et al., 2002) and our ferret V1 data. Tuning bandwidth was generated by converting half-width at  $1/\sqrt{2}$  height ( $\gamma$ ) values from a lognormal distribution ( $\mu = -1, \sigma = 0.6$ ):

$$\kappa = -\log(\sqrt{2}) / (\cos(\gamma^2) - 1)$$

Limited-range correlations were included so neural noise correlation depends on tuning preference difference (Ecker et al., 2011). A correlation matrix,  $C$ , was specified by the difference between preferred orientations of neurons and the maximum pairwise correlation,  $c_o$ :

$$A_{ij} = c_o e^{-|\delta(\phi_i - \phi_j)|}$$

where  $\delta$  is the circular difference and

$$C_{ij} = A_{ij} + (1 - c_o)I$$

where  $I$  is the identity matrix of size  $N$ . We scaled the correlation matrix by the mean firing rate of each neuron to produce Poisson-like noise (Ecker et al., 2011).

Derived weights for a given  $P_{IN}$  were artificially smoothed using the following equation from (Park and Pillow, 2011):

$$S_{ij}^{+e} - \left( \rho_1 + \left( \frac{\delta(\phi_i - \phi_j)}{\rho_2} \right) \right)$$

375

376 Here,  $S^+$  is the pseudoinverse of  $S$ ,  $\delta(\phi_i - \phi_j)$  is the circular difference between preferred  
377 orientations of neurons,  $\rho_1$  scales the amplitude of smoothing, and  $\rho_2$  scales functional range of  
378 smoothing.

379

### 380 *Population decoder estimation accuracy*

381

382 Decoding accuracy was calculated with the mean-squared-error of the maximum a  
383 posterior probability (MAP) estimate across  $t$  simulated trials of each stimulus ( $k$ ):

$$384 \text{error}(k) = \left( \frac{1}{t} \right) \sum_1^t \text{angle}(e^{i(MAP(w_k) - \theta_k)})^2$$

385 Here,  $w_k$  are the weights for a given decoder neuron and  $\theta_k$  is the true stimulus.

386

### 387 *Viral Injections*

388

389 Briefly, female ferrets aged P18-23 (Marshall Farms) were anesthetized with isoflurane  
390 (delivered in O<sub>2</sub>). Atropine was administered and a 1:1 mixture of lidocaine and bupivacaine was  
391 administered SQ. Animals were maintained at an internal temperature of 37 degrees Celsius.  
392 Under sterile surgical conditions, a small craniotomy (0.8 mm diameter) was made over the visual  
393 cortex (7-8mm lateral and 2-3mm anterior to lambda). A mixture of diluted AAV1.hSyn.Cre  
394 (1:25000 to 1:50000) and AAV1.Syn.FLEX.GCaMP6s (UPenn) was injected (125 - 202.5 nL)  
395 through beveled glass micropipettes (10-15 micron outer diameter) at 600, 400, and 200 microns  
396 below the pia. Finally, the craniotomy was filled with sterile agarose (Type IIIa, Sigma-Aldrich)  
397 and the incision site was sutured.

398

### 399 *Cranial Window*

400

401 After 3-5 weeks of expression, ferrets were anesthetized with 50mg/kg ketamine and  
402 isoflurane. Atropine and bupivacaine were administered, animals were placed on a feedback-  
403 controlled heating pad to maintain an internal temperature of 37 degrees Celsius, and intubated  
404 to be artificially respirated. Isoflurane was delivered throughout the surgical procedure to maintain  
405 a surgical plane of anesthesia. An intravenous cannula was placed to deliver fluids. Tidal CO<sub>2</sub>,

406 external temperature, and internal temperature were continuously monitored. The scalp was  
407 retracted and a custom titanium headplate adhered to the skull (Metabond, Parkell). A craniotomy  
408 was performed and the dura retracted to reveal the cortex. One piece of custom cover-glass (3mm  
409 diameter, 0.7mm thickness, Warner Instruments) adhered using optical adhesive (71, Norland  
410 Products) to custom insert was placed onto the brain to dampen biological motion during imaging.  
411 A 1:1 mixture of tropicamide ophthalmic solution (Akorn) and phenylephrine hydrochloride  
412 ophthalmic solution (Akorn) was applied to both eyes to dilate the pupils and retract the nictating  
413 membranes. Contact lenses were inserted to protect the eyes. Upon completion of the surgical  
414 procedure, isoflurane was gradually reduced and pancuronium (2 mg/kg/hr) was delivered IV.

415

#### 416 *Visual Stimuli*

417

418 Visual stimuli were generated using Psychopy (Peirce, 2007). The monitor was placed 25  
419 cm from the animal. Receptive field locations for each cell were hand mapped and the spatial  
420 frequency optimized (range: 0.04 to 0.25 cpd). For each soma and dendritic segment, square-  
421 wave drifting gratings were presented at 22.5 degree increments (2 second duration, 1 second  
422 ISI, 8-10 trials for each field of view).

423

#### 424 *Two photon imaging*

425

426 Two photon imaging was performed on a Bergamo II microscope (Thorlabs) running  
427 Scanimage (Pologruto et al., 2003) (Vidrio Technologies) with 940nm dispersion-compensated  
428 excitation provided by an Insight DS+ (Spectraphysics). For spine and axon imaging, power after  
429 the objective was limited to < 50 mW. Cells were selected for imaging on the basis of their position  
430 relative to large blood vessels, responsiveness to visual stimulation, and lack of prolonged  
431 calcium transients resulting from over-expression of GCaMP6s. Images were collected at 30 Hz  
432 using bidirectional scanning with 512x512 pixel resolution or with custom ROIs (frame rate range:  
433 22 - 50 Hz). Somatic imaging was performed with a resolution of 2.05 - 10.24 pixels/micron.  
434 Dendritic spine imaging was performed with a resolution of 6.10 -15.36 pixels/micron.

435

#### 436 *Two Photon Imaging Analysis*

437

438 Imaging data were excluded from analysis if motion along the z-axis was detected.  
439 Dendrite images were corrected for in-plane motion via a 2D cross-correlation based approach in

440 MATLAB or using a piecewise non-rigid motion correction algorithm (Pnevmatikakis and  
441 Giovannucci, 2017). ROIs (region of interest) were drawn in ImageJ; dendritic ROIs spanned  
442 contiguous dendritic segments and spine ROIs were fit with custom software. Mean pixel values  
443 for ROIs were computed over the imaging time series and imported into MATLAB (Hiner et al.,  
444 2017; Sage et al., 2012).  $\Delta F/F_0$  was computed by computing  $F_0$  with time-averaged median or  
445 percentile filter (10th percentile). For spine signals, we subtracted a scaled version of the dendritic  
446 signal to remove back-propagating action potentials as performed previously (Wilson et al., 2016).  
447  $\Delta F/F_0$  traces were synchronized to stimulus triggers sent from Psychopy and collected by Spike2.  
448 Spines were included for analysis if the SNR of the preferred response exceeded 2 median  
449 absolute deviations above the baseline noise (measured during the blank) and were weakly  
450 correlated with the dendritic signal (Spearman's correlation,  $r < 0.4$ ). Some spine traces contained  
451 negative events after subtraction, so correlations were computed ignoring negative values. We  
452 then normalized each spine's responses so that each spine had equal weight. Preferred  
453 orientation for each spine was calculated by fitting responses with a Gaussian tuning curve using  
454 `lsqcurvefit` (Matlab). Tuning selectivity was measured as the vector strength index ( $v$ ) for each  
455 neuron's response:

$$456 \quad v_i = \frac{\sqrt{\sum (r_i \cos \theta_k)^2 + \sum (r_i \sin \theta_k)^2}}{\sum r_i}$$

457 Here  $r$  is the mean responses over the orientations ( $\theta_k$ ) presented for each spine ( $i$ ). Note, this  
458 same index is used to characterize simulated input selectivity.

459

## 460 *Analysis*

461

462 To compare input tuning (derived synaptic population or measured dendritic spine  
463 population) with output tuning (downstream readout or measured somatic tuning) we computed  
464 the Pearson Correlation coefficient (Matlab). This correlation was computed on trial-averaged  
465 responses across different orientations. For dendritic spines and soma, measured responses  
466 across stimulus presentation trials were averaged. For simulated synaptic populations and  
467 corresponding downstream readout neuron, we simulated trials by adding noise to each synaptic  
468 tuning curve.

469

## 470 **Code Availability**

471

472 Matlab code to generate input and readout populations used are provided:

473 <https://github.com/schollben/SpineProbabilisticModel2020>

#### 474 **Figure Legends**

475

#### 476 **Figure 1: A population decoding framework to study synaptic diversity.**

477 An upstream population of neurons are tuned for a single stimulus variable (orientation) (*top*).

478 This input population is readout by downstream decoder neurons (*bottom*). Downstream neurons

479 decode stimulus identify by reading out spikes from the upstream input population. Each decoder

480 neuron is defined by a set weights (*middle*) over the upstream population, which are summed and

481 rectified to produce an output.

482

#### 483 **Figure 2: Model simulations with homogenous and heterogeneous input populations.**

484 (a) Orientation tuning of a homogenous input population. Shown is a subset of the total population

485 ( $n = 20/1000$ ). Ordinate is orientation preference, restricted between  $-90^\circ$  and  $90^\circ$ . (b) Derived

486 weights for a single decoder neuron (preferring  $0^\circ$ ) reading out the homogenous (*blue*) input

487 population in (a). Weights for homogenous populations smoothly vary over orientation space. (c)

488 Response output of the decoder neuron whose weights are shown in (b). (d-f) Same as in (a-c)

489 for a heterogeneous input population with moderate correlation ( $c_o = 0.25$ ). Note that decoder

490 weights for heterogeneous input populations are not smooth.

491

#### 492 **Figure 3: Decoder performance of heterogeneous input populations depends on** 493 **population size, correlations, and weight diversity.**

494 (a) Example weight distribution for a decoder neuron reading out a heterogeneous input

495 population (*top*). Shown are the effects of progressively smoothing weights. Smooth parameters

496 (see Methods) from top to bottom:  $(0,0)$ ,  $(0.1,1)$ ,  $(0.2,2)$ ,  $(1,10)$ . Ordinate is orientation preference,

497 restricted between  $-90^\circ$  and  $90^\circ$ . (b) Decoder performance (inverse mean-squared-error) plotted

498 for homogenous and heterogeneous input populations of increasing size. Simulations here

499 include no correlations ( $c_o = 0$ ). Shading indicates standard error. (c) Same as in (b) for input

500 populations with moderate correlation ( $c_o = 0.25$ ). (d) Same as in (b) for input populations with

501 stronger correlation ( $c_o = 0.50$ ).

502

#### 503 **Figure 4: Simulation of synaptic populations from decoder neuron weight distributions.** (a)

504 Example weight distribution for a single decoder neuron tuned to  $0^\circ$  (*left*). Ordinates are

505 orientation preference, restricted between  $-90^\circ$  and  $90^\circ$ . Dashed line separates excitatory

506 (positive) and inhibitory (negative) weights. Excitatory weight distribution over the input population  
507 is transformed into a frequency distribution, whereby greater amplitude equates to greater  
508 frequency of occurrence (*right*). (b) Example simulated synaptic population ( $n = 100$  spines) from  
509 the weight distribution in (a). Shown are the orientation tuning curves of each simulated synapse  
510 (normalized).

511  
512 **Figure 5: Orientation tuning diversity of dendritic spine populations in ferret V1 match**  
513 **simulations with correlated, heterogeneous input populations.**

514 (a) Two-photon standard-deviation projection of example dendrite and spines recorded from a  
515 single cell (*left*). Inset: Two-photon standard-deviation projection of corresponding soma. Scale  
516 bar is 10 microns. Orientation tuning of soma (*top*) and all visually-responsive dendritic spines  
517 from this single cell ( $n = 159$ ) are shown (*right*). Spine responses are normalized peak  $\Delta F/F$ .  
518 Orientation preferences are shown relative to the somatic preference (aligned to  $0^\circ$ ). (b) Same as  
519 in (a) for another example cell ( $n = 162$  visually-responsive spines). (c) Cumulative distributions  
520 of tuning correlation between individual dendritic spines or simulated synaptic inputs with  
521 corresponding somatic tuning or decoder output. Shown are correlations of simulations of  
522 homogenous (*blue*) or heterogeneous (*red*) input populations, compared to empirical data (*gray*).  
523 (d) Distributions of average tuning correlation between synaptic input and somatic output across  
524 measured cells ( $n = 45$ ). Also shown are distributions of average tuning correlation for simulated  
525 cells. Triangles denote median values for each distribution. (e) Comparison of Kullback-Leibler  
526 divergence ( $D_{KL}$ ) between data and each model type. Each data point represents an individual  
527 cell's population of dendritic spines.

## 528 Bibliography

529

530 Averbeck, B.B., Latham, P.E., Pouget, A., 2006. Neural correlations, population coding and computation.  
531 *Nat. Rev. Neurosci.* 7, 358–366. doi:10.1038/nrn1888

532 Avitan, L., Goodhill, G.J., 2018. Code under construction: neural coding over development. *Trends*  
533 *Neurosci.* 41, 599–609. doi:10.1016/j.tins.2018.05.011

534 Berens, P., Ecker, A.S., Gerwinn, S., Tolias, A.S., Bethge, M., 2011. Reassessing optimal neural  
535 population codes with neurometric functions. *Proc. Natl. Acad. Sci. USA* 108, 4423–4428.  
536 doi:10.1073/pnas.1015904108

537 Butts, D.A., Goldman, M.S., 2006. Tuning curves, neuronal variability, and sensory coding. *PLoS Biol.* 4,  
538 e92. doi:10.1371/journal.pbio.0040092

539 Chalk, M., Masset, P., Deneve, S., Gutkin, B., 2017. Sensory noise predicts divisive reshaping of  
540 receptive fields. *PLoS Comput. Biol.* 13, e1005582. doi:10.1371/journal.pcbi.1005582

541 Chen, T.-W., Wardill, T.J., Sun, Y., Pulver, S.R., Renninger, S.L., Baohan, A., Schreiter, E.R., Kerr,  
542 R.A., Orger, M.B., Jayaraman, V., Looger, L.L., Svoboda, K., Kim, D.S., 2013. Ultrasensitive  
543 fluorescent proteins for imaging neuronal activity. *Nature* 499, 295–300.  
544 doi:10.1038/nature12354

545 Chen, X., Leischner, U., Rochefort, N.L., Nelken, I., Konnerth, A., 2011. Functional mapping of single  
546 spines in cortical neurons in vivo. *Nature* 475, 501–505. doi:10.1038/nature10193

547 Cossell, L., Iacaruso, M.F., Muir, D.R., Houlton, R., Sader, E.N., Ko, H., Hofer, S.B., Mrsic-Flogel, T.D.,  
548 2015. Functional organization of excitatory synaptic strength in primary visual cortex. *Nature*  
549 518, 399–403. doi:10.1038/nature14182

550 Dayan, P., Abbott, L.F., 2001. Theoretical neuroscience: computational and mathematical modeling of  
551 neural systems.

552 DiCarlo, J.J., Zoccolan, D., Rust, N.C., 2012. How does the brain solve visual object recognition? *Neuron*  
553 73, 415–434. doi:10.1016/j.neuron.2012.01.010

554 Ecker, A.S., Berens, P., Tolias, A.S., Bethge, M., 2011. The effect of noise correlations in populations of  
555 diversely tuned neurons. *J. Neurosci.* 31, 14272–14283. doi:10.1523/JNEUROSCI.2539-11.2011

556 Goris, R.L.T., Simoncelli, E.P., Movshon, J.A., 2015. Origin and function of tuning diversity in macaque  
557 visual cortex. *Neuron* 88, 819–831. doi:10.1016/j.neuron.2015.10.009

558 Graf, A.B.A., Kohn, A., Jazayeri, M., Movshon, J.A., 2011. Decoding the activity of neuronal  
559 populations in macaque primary visual cortex. *Nat. Neurosci.* 14, 239–245. doi:10.1038/nn.2733

560 Haefner, R.M., Gerwinn, S., Macke, J.H., Bethge, M., 2013. Inferring decoding strategies from choice  
561 probabilities in the presence of correlated variability. *Nat. Neurosci.* 16, 235–242.  
562 doi:10.1038/nn.3309

563 Hiner, M.C., Rueden, C.T., Eliceiri, K.W., 2017. ImageJ-MATLAB: a bidirectional framework for  
564 scientific image analysis interoperability. *Bioinformatics* 33, 629–630.  
565 doi:10.1093/bioinformatics/btw681



- 566 Holtmaat, A., Svoboda, K., 2009. Experience-dependent structural synaptic plasticity in the mammalian  
567 brain. *Nat. Rev. Neurosci.* 10, 647–658. doi:10.1038/nrn2699
- 568 Hubel, D.H., Wiesel, T.N., 1962. Receptive fields, binocular interaction and functional architecture in the  
569 cat's visual cortex. *J. Physiol. (Lond.)* 160, 106–154. doi:10.1113/jphysiol.1962.sp006837
- 570 Iacaruso, M.F., Gasler, I.T., Hofer, S.B., 2017. Synaptic organization of visual space in primary visual  
571 cortex. *Nature* 547, 449–452. doi:10.1038/nature23019
- 572 Jaini, P., Burge, J., 2017. Linking normative models of natural tasks to descriptive models of neural  
573 response. *J. Vis.* 17, 16. doi:10.1167/17.12.16
- 574 Jazayeri, M., Movshon, J.A., 2006. Optimal representation of sensory information by neural populations.  
575 *Nat. Neurosci.* 9, 690–696. doi:10.1038/nn1691
- 576 Jia, H., Rochefort, N.L., Chen, X., Konnerth, A., 2010. Dendritic organization of sensory input to cortical  
577 neurons in vivo. *Nature* 464, 1307–1312. doi:10.1038/nature08947
- 578 Jia, H., Rochefort, N.L., Chen, X., Konnerth, A., 2011. In vivo two-photon imaging of sensory-evoked  
579 dendritic calcium signals in cortical neurons. *Nat. Protoc.* 6, 28–35. doi:10.1038/nprot.2010.169
- 580 Ju, N., Li, Y., Liu, F., Jiang, H., Macknik, S.L., Martinez-Conde, S., Tang, S., 2020. Spatiotemporal  
581 functional organization of excitatory synaptic inputs onto macaque V1 neurons. *Nat. Commun.*  
582 11, 697. doi:10.1038/s41467-020-14501-y
- 583 Kerlin, A., Mohar, B., Flickinger, D., MacLennan, B.J., Dean, M.B., Davis, C., Spruston, N., Svoboda,  
584 K., 2019. Functional clustering of dendritic activity during decision-making. *Elife* 8.  
585 doi:10.7554/eLife.46966
- 586 Ko, H., Hofer, S.B., Pichler, B., Buchanan, K.A., Sjöström, P.J., Mrsic-Flogel, T.D., 2011. Functional  
587 specificity of local synaptic connections in neocortical networks. *Nature* 473, 87–91.  
588 doi:10.1038/nature09880
- 589 Kohn, A., Coen-Cagli, R., Kanitscheider, I., Pouget, A., 2016. Correlations and neuronal population  
590 information. *Annu. Rev. Neurosci.* 39, 237–256. doi:10.1146/annurev-neuro-070815-013851
- 591 Lee, W.-C.A., Bonin, V., Reed, M., Graham, B.J., Hood, G., Glatfelter, K., Reid, R.C., 2016. Anatomy  
592 and function of an excitatory network in the visual cortex. *Nature* 532, 370–374.  
593 doi:10.1038/nature17192
- 594 Ma, W.J., Beck, J.M., Latham, P.E., Pouget, A., 2006. Bayesian inference with probabilistic population  
595 codes. *Nat. Neurosci.* 9, 1432–1438. doi:10.1038/nn1790
- 596 Movshon, J.A., Thompson, I.D., Tolhurst, D.J., 1978. Receptive field organization of complex cells in the  
597 cat's striate cortex. *J. Physiol. (Lond.)* 283, 79–99. doi:10.1113/jphysiol.1978.sp012489
- 598 Pagan, M., Simoncelli, E.P., Rust, N.C., 2016. Neural Quadratic Discriminant Analysis: Nonlinear  
599 Decoding with V1-Like Computation. *Neural Comput.* 28, 2291–2319.  
600 doi:10.1162/NECO\_a\_00890
- 601 Park, M., Pillow, J.W., 2011. Receptive field inference with localized priors. *PLoS Comput. Biol.* 7,  
602 e1002219. doi:10.1371/journal.pcbi.1002219
- 603 Peirce, J.W., 2007. PsychoPy--Psychophysics software in Python. *J. Neurosci. Methods* 162, 8–13.

- 604 doi:10.1016/j.jneumeth.2006.11.017
- 605 Pnevmatikakis, E.A., Giovannucci, A., 2017. NoRMCorre: An online algorithm for piecewise rigid  
606 motion correction of calcium imaging data. *J. Neurosci. Methods* 291, 83–94.  
607 doi:10.1016/j.jneumeth.2017.07.031
- 608 Pologruto, T.A., Sabatini, B.L., Svoboda, K., 2003. ScanImage: flexible software for operating laser  
609 scanning microscopes. *Biomed Eng Online* 2, 13. doi:10.1186/1475-925X-2-13
- 610 Pouget, A., Dayan, P., Zemel, R., 2000. Information processing with population codes. *Nat. Rev.*  
611 *Neurosci.* 1, 125–132. doi:10.1038/35039062
- 612 Reid, R.C., Alonso, J.M., 1995. Specificity of monosynaptic connections from thalamus to visual cortex.  
613 *Nature* 378, 281–284. doi:10.1038/378281a0
- 614 Ringach, D.L., Shapley, R.M., Hawken, M.J., 2002. Orientation selectivity in macaque V1: diversity and  
615 laminar dependence. *J. Neurosci.* 22, 5639–5651. doi:20026567
- 616 Rumyantsev, O.I., Lecoq, J.A., Hernandez, O., Zhang, Y., Savall, J., Chrapkiewicz, R., Li, J., Zeng, H.,  
617 Ganguli, S., Schnitzer, M.J., 2020. Fundamental bounds on the fidelity of sensory cortical coding.  
618 *Nature* 580, 100–105. doi:10.1038/s41586-020-2130-2
- 619 Rust, N.C., Mante, V., Simoncelli, E.P., Movshon, J.A., 2006. How MT cells analyze the motion of visual  
620 patterns. *Nat. Neurosci.* 9, 1421–1431. doi:10.1038/nn1786
- 621 Sage, D., Prodanov, D., Tinevez, J.Y., 2012. MIJ: making interoperability between ImageJ and Matlab  
622 possible. [bigwww.epfl.ch](http://bigwww.epfl.ch).
- 623 Scholl, B., Fitzpatrick, D., 2020. Cortical synaptic architecture supports flexible sensory computations.  
624 *Curr. Opin. Neurobiol.* 64, 41–45. doi:10.1016/j.conb.2020.01.013
- 625 Scholl, B., Thomas, C.I., Ryan, M.A., Kamasawa N., Fitzpatrick D., 2021. Cortical selectivity derives  
626 from strength in numbers of synapses. *Nature* 590 (7844), 111–114.
- 627 Scholl, B., Wilson, D.E., Fitzpatrick, D., 2017. Local Order within Global Disorder: Synaptic  
628 Architecture of Visual Space. *Neuron* 96, 1127–1138.e4. doi:10.1016/j.neuron.2017.10.017
- 629 Seriès, P., Latham, P.E., Pouget, A., 2004. Tuning curve sharpening for orientation selectivity: coding  
630 efficiency and the impact of correlations. *Nat. Neurosci.* 7, 1129–1135. doi:10.1038/nn1321
- 631 Shamir, M., 2014. Emerging principles of population coding: in search for the neural code. *Curr. Opin.*  
632 *Neurobiol.* 25, 140–148. doi:10.1016/j.conb.2014.01.002
- 633 Shamir, M., Sompolinsky, H., 2006. Implications of neuronal diversity on population coding. *Neural*  
634 *Comput.* 18, 1951–1986. doi:10.1162/neco.2006.18.8.1951
- 635 Spitzer, H., Hochstein, S., 1988. Complex-cell receptive field models. *Prog. Neurobiol.* 31, 285–309.  
636 doi:10.1016/0301-0082(88)90016-0
- 637 Stringer, C., Michaelos, M., Pachitariu, M., 2019. High precision coding in mouse visual cortex. *BioRxiv.*  
638 doi:10.1101/679324
- 639 Ujfalussy, B.B., Makara, J.K., Lengyel, M., Branco, T., 2018. Global and Multiplexed Dendritic  
640 Computations under In Vivo-like Conditions. *Neuron* 100, 579–592.e5.

- 641           doi:10.1016/j.neuron.2018.08.032
- 642   Wertz, A., Trenholm, S., Yonehara, K., Hillier, D., Raics, Z., Leinweber, M., Szalay, G., Ghanem, A.,  
643       Keller, G., Rózsa, B., Conzelmann, K.-K., Roska, B., 2015. PRESYNAPTIC NETWORKS.  
644       Single-cell-initiated monosynaptic tracing reveals layer-specific cortical network modules.  
645       *Science* 349, 70–74. doi:10.1126/science.aab1687
- 646   Wilson, D.E., Scholl, B., Fitzpatrick, D., 2018. Differential tuning of excitation and inhibition shapes  
647       direction selectivity in ferret visual cortex. *Nature* 560, 97–101. doi:10.1038/s41586-018-0354-1
- 648   Wilson, D.E., Whitney, D.E., Scholl, B., Fitzpatrick, D., 2016. Orientation selectivity and the functional  
649       clustering of synaptic inputs in primary visual cortex. *Nat. Neurosci.* 19, 1003–1009.  
650       doi:10.1038/nn.4323
- 651   Zavitz, E., Price, N.S.C., 2019. Weighting neurons by selectivity produces near-optimal population codes.  
652       *J. Neurophysiol.* 121, 1924–1937. doi:10.1152/jn.00504.2018
- 653   Zylberberg, J., 2017. Untuned but not irrelevant: A role for untuned neurons in sensory information  
654       coding. *BioRxiv*. doi:10.1101/134379
- 655
